# Supplementary material for: Developing the Leuven Embedded Figures Test (L-EFT): testing the stimulus features that influence embedding
Source: PubMed Central journal article supplement (PMC5267572; doi:10.7717/peerj.2862), 2017-01-24
Supplement: peerj-05-2862-s003.pdf [file peerj-05-2862-s003.pdf]

### Data Set Experiment 1

| Variables         | Description                                                                                                                                                                     |
|-------------------|---------------------------------------------------------------------------------------------------------------------------------------------------------------------------------|
| TrialNumber       | The number of the trial presented to the participant (ranging from 0 to 63).                                                                                                    |
| N_target          | The number of lines of which the target is made up (ranging from 3 to 8).                                                                                                       |
| N_cont            | The number of lines continued from the target into the embedding context (ranging from 0 to a maximum equal to the number of target lines).                                     |
| N_alter           | The number of lines in the two embedding contexts that did not contain the target (distractors).                                                                                |
| N_crossing        | The number of lines across the target shape in the embedding context.                                                                                                           |
| Closure           | Is the target shape open (0) or closed (1)?                                                                                                                                     |
| Symmetry          | Is the target shape symmetric (1) or asymmetric (0)?                                                                                                                            |
| Acc               | Was the first response made by the participant accurate? 0 if participant chose one of the two wrong response alternatives, and 1 if he chose the correct response alternative. |
| NumberofResponses | How many responses did the participant make before answering correct?                                                                                                           |
| participant.ID    | The unique user ID of the participant                                                                                                                                           |
| RT                | The response time of the participant for the first response they made (in milliseconds).                                                                                        |

### Data Set Experiment 2

|                |                                                                                                                                             |
|----------------|---------------------------------------------------------------------------------------------------------------------------------------------|
| N_target       | The number of lines of which the target is made up (ranging from 3 to 8).                                                                   |
| N_cont         | The number of lines continued from the target into the embedding context (ranging from 0 to a maximum equal to the number of target lines). |
| N_alter        | The number of lines in the two embedding contexts that did not contain the target (distractors).                                            |
| N_crossing     | The number of lines across the target shape in the embedding context.                                                                       |
| Closure        | Is the target shape open (0) or closed (1)?                                                                                                 |
| Symmetry       | Is the target shape symmetric (1) or asymmetric (0)?                                                                                        |
| participant.ID | The unique user ID of the participant                                                                                                       |

|             |                                                                                                                                     |
|-------------|-------------------------------------------------------------------------------------------------------------------------------------|
| TrialNumber | The number of the trial presented to the participant (ranging from 1 to 128).                                                       |
| run         | The block of trials. 0 for the first block of 64 trials and 1 for the second block of 64 trials.                                    |
| RT          | The response time of the participant (in seconds).                                                                                  |
| Acc         | Was the response of the participant correct? 0 if participant chose incorrect alternative, and 1 if they chose correct alternative. |
